# Supplementary material for: Hematopoietic stem cells undergo a lymphoid to myeloid switch in early stages of emergency granulopoiesis
Source: PubMed Central journal article supplement (PMC10690458; doi:10.15252/embj.2023113527), 2023-10-17
Supplement: EMBJ-42-e113527-s006.pdf [file EMBJ-42-e113527-s006.pdf]

# Contents

|                          |   |
|--------------------------|---|
| Appendix Figure S1 ..... | 2 |
| Appendix Figure S2 ..... | 3 |
| Appendix Figure S3 ..... | 4 |
| Appendix Figure S4 ..... | 5 |
| Appendix Table S1 .....  | 6 |
| Appendix Table S2 .....  | 7 |

# Appendix Figure S1

**A**

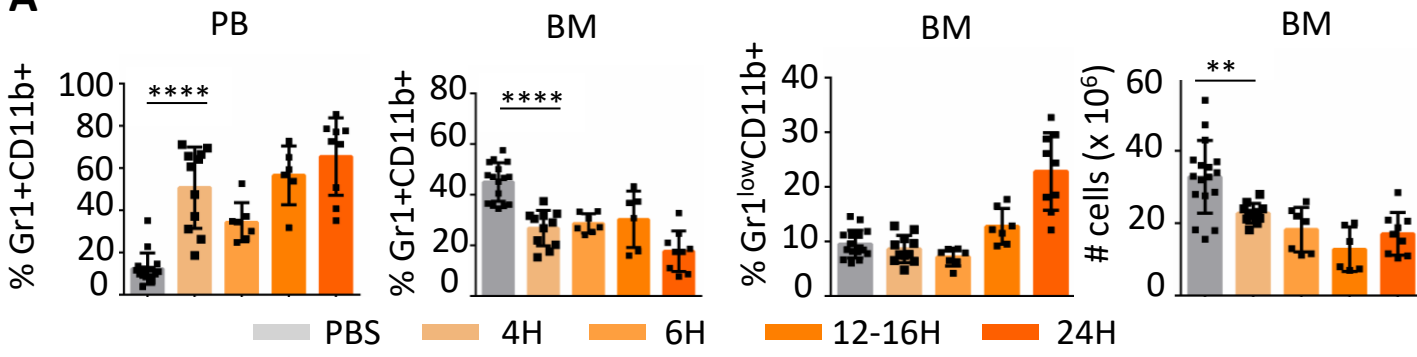

**B**

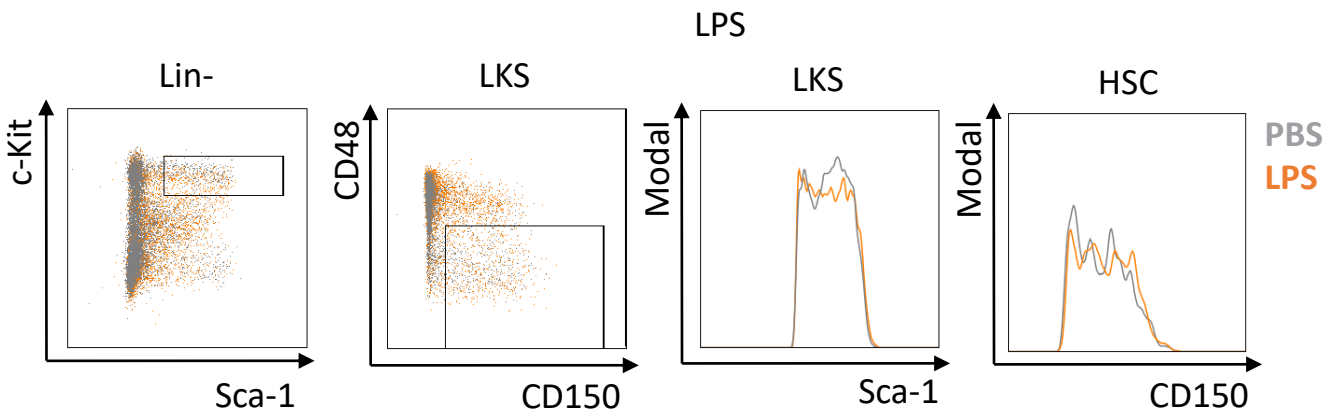

**C**

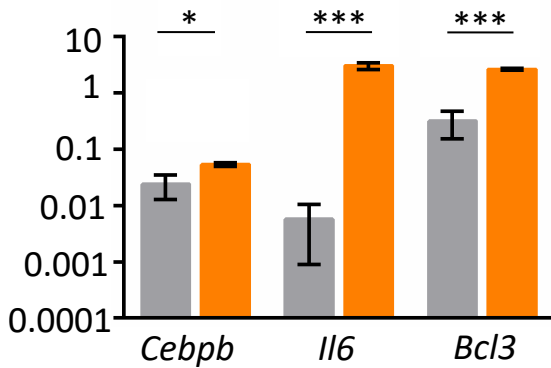

**D**

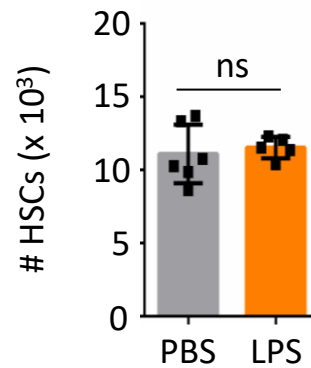

**Appendix Figure S1. Emergency granulopoiesis response upon LPS stimulation.** (A) Peripheral blood (PB) and bone marrow (BM) analysis 4, 6, 12-16 or 24 hours after 35  $\mu$ g LPS (shades of orange) or PBS control (gray) injection into C57Bl/6 mice. Each symbol represents values for one mouse. Data represents mean  $\pm$  SD from 4 independent experiments. (B) Flow cytometric analysis of BM cells isolated from PBS- (gray) or LPS- (orange) treated mice. Left dot plots illustrate expression of c-Kit and Sca-1 in the Lin<sup>-</sup> BM cells, and CD48 and CD150 expression in the LKS population. Right histograms indicate expression of Sca-1 in the LKS population and CD150 expression in the HSC population. (C) Quantitative RT-PCR from HSCs isolated from C57Bl/6 mice treated with PBS (gray) or 35  $\mu$ g LPS (orange) for 4 hours. Expression of *Cebpb*, *Il6*, and *Bcl3* is indicated. The y-axes represent relative expression compared with *Actb* control. Data represent mean  $\pm$  SD from a representative experiment out of 2 independent experiments. (D) Number of HSCs in BM (leg and hip) 4 hours upon PBS or LPS administration. Y-axis indicates absolute number. Data represents mean  $\pm$  SD from 2 independent experiments. In this figure, two-tailed Student's t test was used to assess statistical significance (\*P < 0.05, \*\*P < 0.01, \*\*\*P < 0.001, \*\*\*\*P < 0.0001, ns: not significant).

# Appendix Figure S2

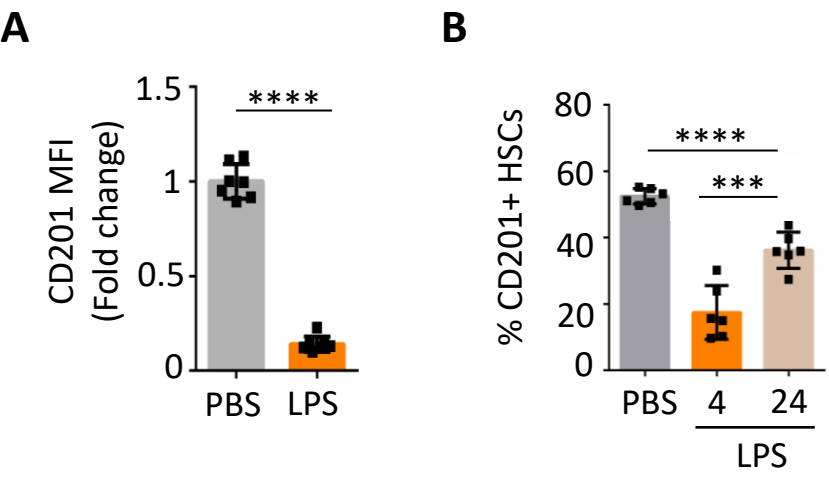

**Appendix Figure S2. CD201 levels in HSCs upon LPS-induced emergency granulopoiesis. (A)** CD201 in HSCs 4 hours after administration of LPS or PBS control. Values indicate CD201 mean fluorescence intensity (MFI) relative to PBS treatment. X-axis indicates fold change. **(B)** Percentage of CD201+ HSCs in BM upon administration of PBS or LPS. X-axis indicates time of analysis upon LPS administration. Data represents mean  $\pm$  SD from 2 independent experiments. Each symbol represents values for 1 mouse. At least 6 mice were used in each group. Two-tailed Student's t test was used to assess statistical significance (\*\*P < 0.001, \*\*\*\*P < 0.0001).

# Appendix Figure S3

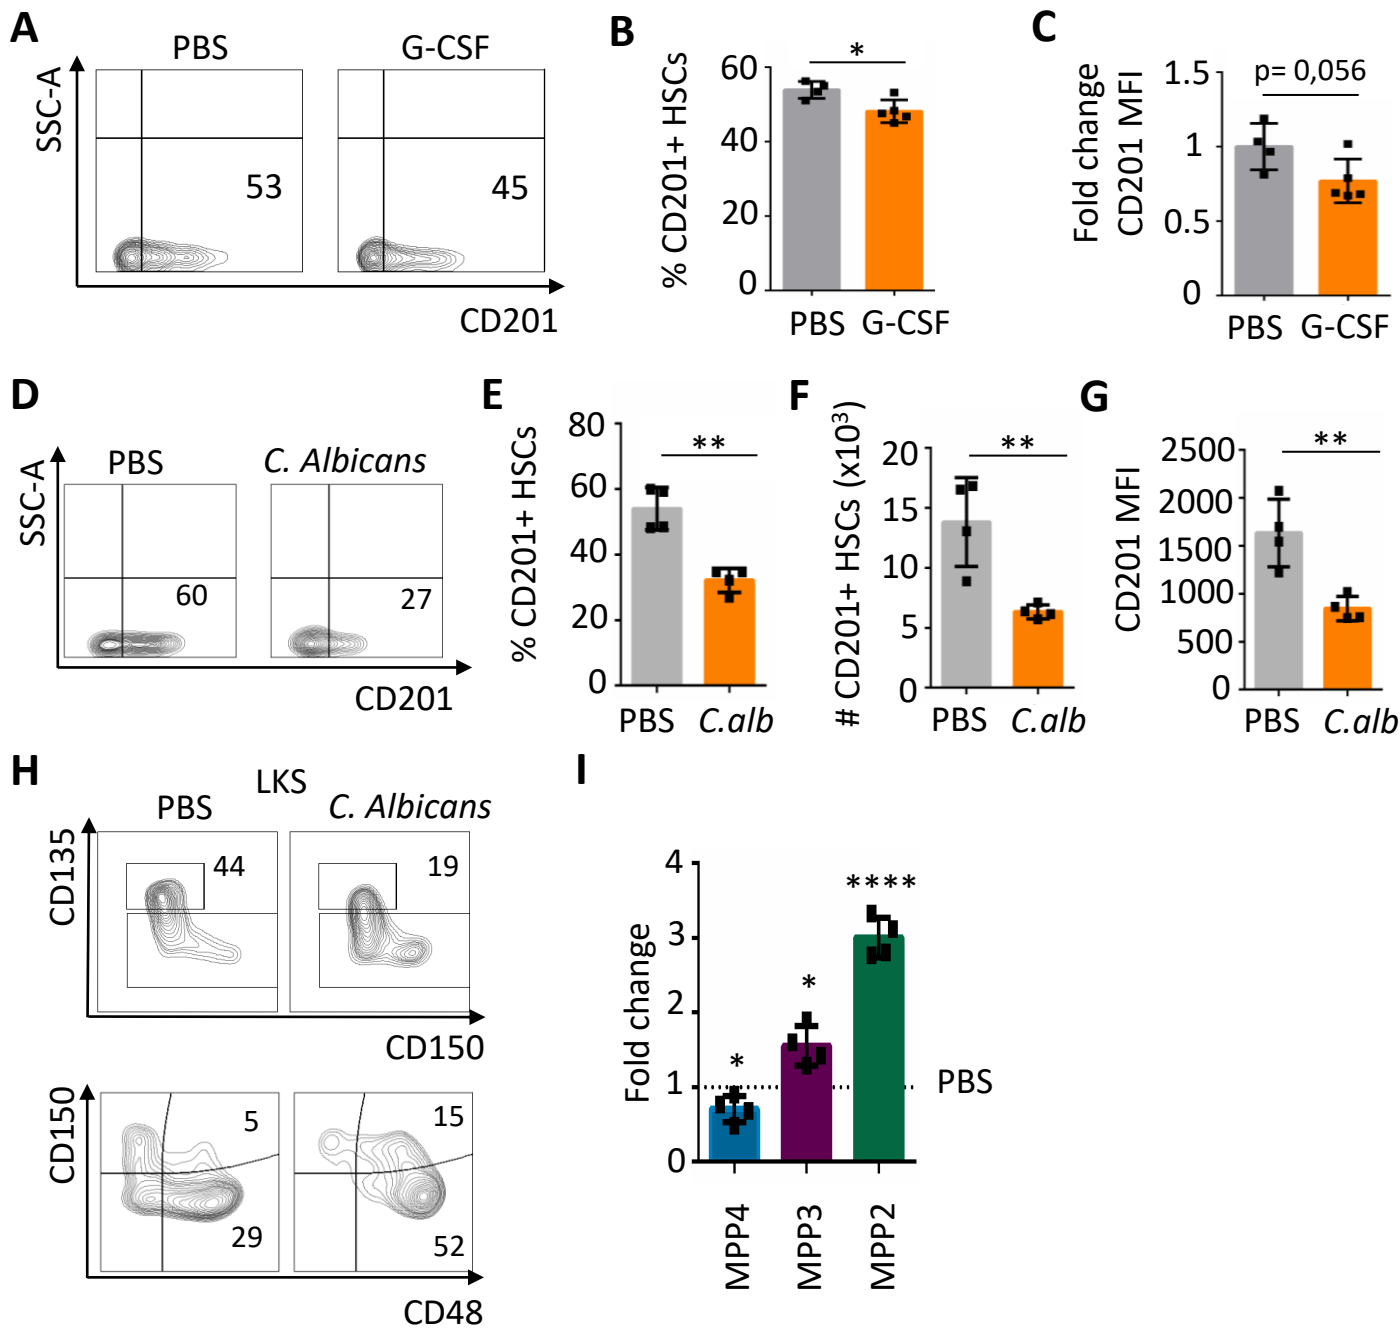

**Appendix Figure S3. CD201 levels in HSCs during emergency granulopoiesis induced by administration of G-CSF and *Candida albicans* (*C. albicans*).** (A) Representative flow cytometric plots of BM HSCs isolated from mice treated with PBS control or 250  $\mu\text{g}/\text{kg}$  G-CSF (intraperitoneally) for 4 hours. X-axes indicate expression of CD201 in HSCs. Numbers indicate percentage of CD201+ HSCs. (B-C) Quantification of panel a. Panel b indicates percentage of CD201+ HSCs upon treatment, and panel c indicates the mean fluorescence intensity (MFI) relative to PBS treatment. (D) Representative flow cytometric plots of HSCs isolated from PBS or *C. albicans* treated mice. X-axes indicate CD201 expression in HSCs. Numbers indicate percentage of CD201+ HSCs. (E-G) Quantification of panel d. Panel e indicates percentage of CD201+ HSCs, panel f number of CD201+ HSCs, and panel g indicates the MFI relative to PBS treatment. (H) Representative plots from BM isolated from mice challenged with PBS (left) or *C. albicans* (right). Plots indicate gating strategy to identify progenitor and stem cell populations. Numbers indicate percentages of LKS. (I) Quantification of panel h. Y-axes indicate fold change from PBS- to *C. albicans*-treated mice. In this figure, at least 4 animals were included in each group. All data represent mean  $\pm$  SD from 2 independent experiments. Two-tailed Student's t test was used to assess statistical significance (\* $P < 0.05$ , \*\* $P < 0.01$ , and \*\*\*\* $P < 0.0001$ ).

# Appendix Figure S4

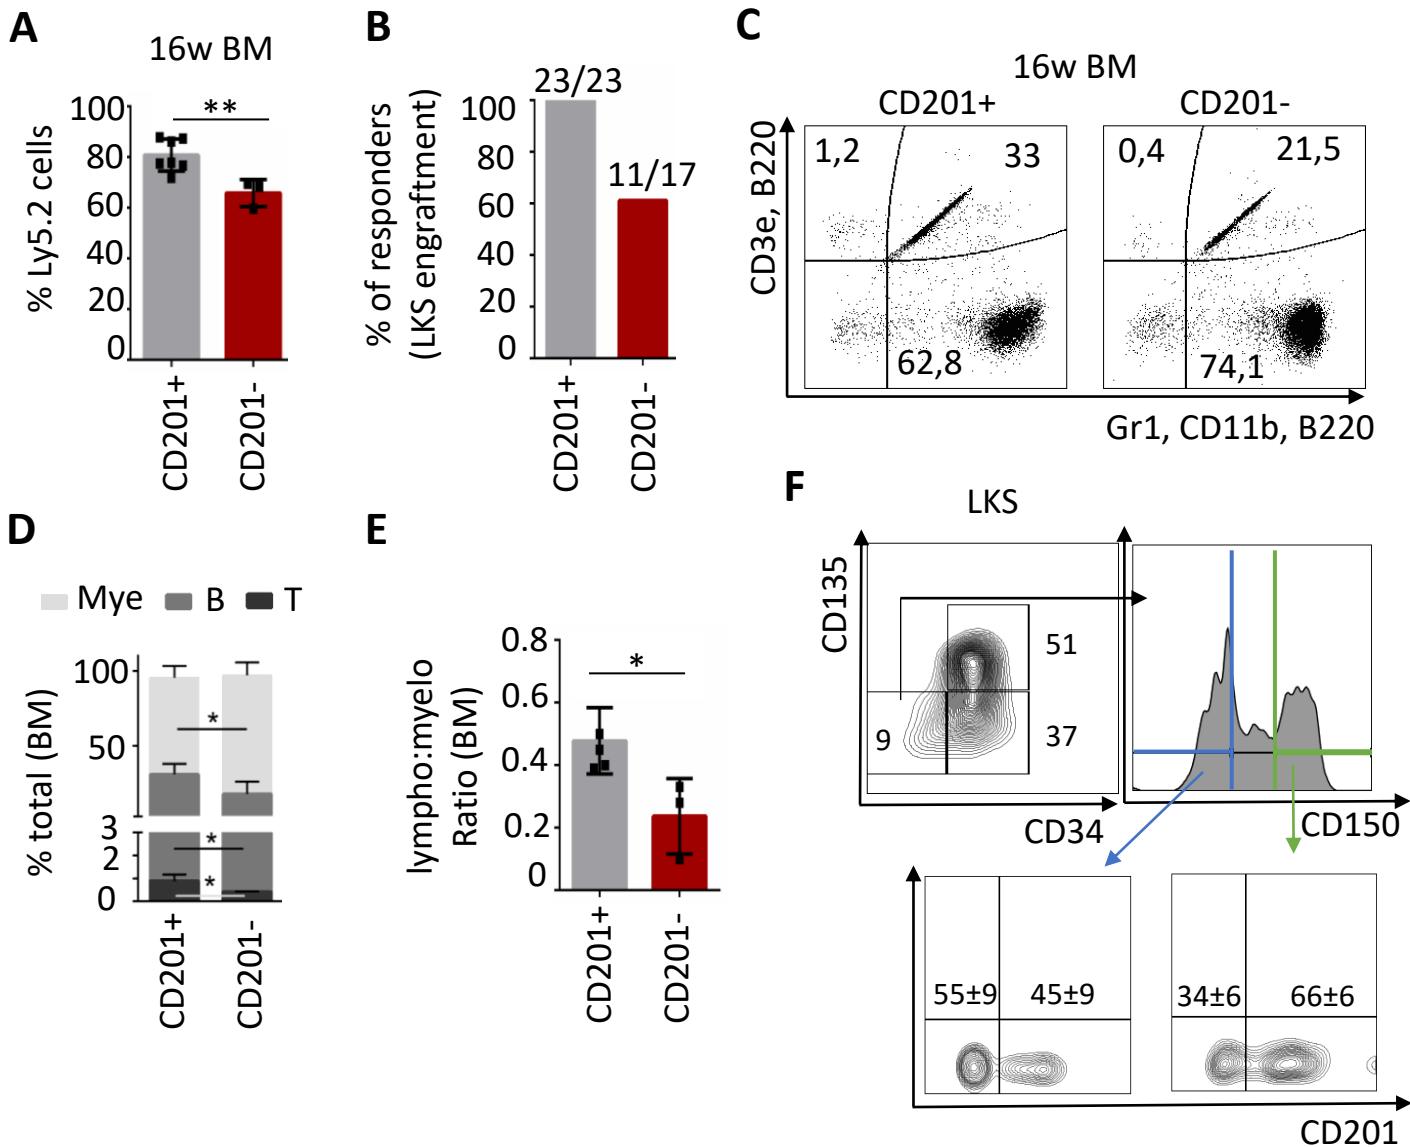

**Appendix Figure S4. CD201<sup>+</sup> and CD201<sup>-</sup> HSC output in steady-state conditions.** (A) BM analysis of mice transplanted with CD201<sup>+</sup> or CD201<sup>-</sup> HSCs. Y-axis indicates percentage of Ly5.2<sup>+</sup> donor derived CD201<sup>+</sup> or CD201<sup>-</sup> HSCs in BM 16 weeks after transplantation. X-axis indicates group transplanted with CD201<sup>+</sup> or CD201<sup>-</sup> HSCs. This is a representative experiment out of 3. Each symbol indicates one mouse. (B) Quantification of the number of animals that exhibited engraftment upon transplantation. A mouse was considered as a responder when engraftment in BM LKS was > 0.5 % of donor derived Lin<sup>-</sup> cells 16 weeks after transplantation. Y-axis indicates the percentage of responders in mice transplanted with CD201<sup>+</sup> or CD201<sup>-</sup> HSCs. (C) Representative flow cytometric plots showing tri-lineage reconstitution in BM 16 weeks upon transplantation of CD201<sup>+</sup> and CD201<sup>-</sup> HSCs. The x-axes indicate expression of Gr1, CD11b, and B220. The y-axes indicate expression of CD3e and B220. Upper left quadrant indicates percentage of T cells, upper right quadrant indicates percentage of B cells, and lower right quadrant indicates percentage of myeloid cells. (D) Quantification of panel c. At least 5 animals were included in each group. (E) Quantification of lymphoid versus myeloid derived cells upon transplantation of CD201<sup>+</sup> and CD201<sup>-</sup> HSCs. Y-axis indicates the lymphoid to myeloid ratio in BM 16 weeks upon transplantation. Data in this figure represent mean ± SD from 2 independent experiments. Two-tailed Student's t test was used to assess statistical significance (\*P < 0.05, \*\*P < 0.01). (F) Representative flow cytometry plots based on expression of CD135 and CD34 in LKS cells (left panel). CD135<sup>-</sup>CD34<sup>-</sup> cells were gated into CD150<sup>-</sup> (blue gate) and CD150<sup>+</sup> (green gate), and further divided according to CD201 expression levels (lower plots). Numbers indicate average ± standard deviation (n=5 mice).

# Appendix Table S1

| Rank | Meg/E   | Transition | Lymphoid | Inflamm   | Myeloid  |
|------|---------|------------|----------|-----------|----------|
| 1    | Hmgb2   | Cmtm7      | Hlf      | Iigp1     | Ccl5     |
| 2    | Top2a   | Gpx1       | Prtn3    | Cxcl10    | Rsad2    |
| 3    | Stmn1   | Coro1a     | Lmo2     | Ly6a      | Isg15    |
| 4    | Dut     | Prdx2      | Txnip    | Gbp2      | Nfkbia   |
| 5    | Mki67   | Park7      | Gcnt2    | Gm4951    | Fyb      |
| 6    | Ran     | Igfbp4     | Adgrg1   | Ifit3     | Marcks   |
| 7    | Pf4     | Gpi1       | Mllt3    | Serpina3g | Neur13   |
| 8    | Cks2    | Fkbp3      | Cbfa2t3  | Stat1     | Gbp3     |
| 9    | Tgfb1   | Aprt       | Hacd4    | Plac8     | Cd74     |
| 10   | Tuba1b  | Aldh2      | Lst1     | Rgs1      | Gadd45b  |
| 11   | Tubb5   | Lyz2       | Adgrl4   | Slfn5     | Ifit1    |
| 12   | Hmgb1   | Taldo1     | Angpt1   | Ifi203    | Tnfp3    |
| 13   | Lmnb1   | Pgam1      | Mettl7a1 | Igtp      | Batf     |
| 14   | Dctpp1  | Myc        | Eif4a2   | Mndal     | Manf     |
| 15   | Nap111  | Vim        | Procr    | Ifi44     | Hspa5    |
| 16   | Pbx1    | Nme4       | Arhgdib  | Ifi204    | Ccl4     |
| 17   | Ldha    | Tecr       | Sox4     | Socs1     | Fth1     |
| 18   | Anp32b  | Trmt112    | Smarca2  | Gbp7      | Oasl1    |
| 19   | Nrgn    | Pebp1      | Zfp3612  | Zbp1      | Traf1    |
| 20   | Nucks1  | Lamtor4    | Zbtb20   | Gbp5      | Cebpd    |
| 21   | Cdk6    | Emp3       | Ptpn18   | Gbp4      | Sod2     |
| 22   | Cdca8   | Vamp8      | Msi2     | Serpina3f | Ikbke    |
| 23   | Tmpo    | Pkm        | Nfic     | Ms4a4c    | Spi1     |
| 24   | Cks1b   | Tspan4     | Ramp1    | Cxc19     | Cd69     |
| 25   | Ptma    | Gsto1      | Pdzk1ip1 | Irf7      | Icos1    |
| 26   | Atpif1  | Ptov1      | Pik3ip1  | Isg20     | Cxcl2    |
| 27   | Pcna    | Gclm       | Ypel3    | Bst2      | Pdia6    |
| 28   | Smc2    | Phgdh      | Gimap1   | Pim1      | Nfkb1    |
| 29   | Apoe    | H2-DMA     | Pik3r1   | Samhd1    | Mapkapk2 |
| 30   | Birc5   | Ech1       | Cox7a2l  | Jun       | Cebpb    |
| 31   | Cdk1    | Rangrf     | Kit      | Ifi47     | Pou2f2   |
| 32   | Smc4    | Pfkl       | Sirt3    | Ifit2     | Tm4sf1   |
| 33   | Ybx3    | Slc25a4    | Foxp1    | Herc6     | Cmpk2    |
| 34   | Spe24   | Mettl26    | Smpdl3a  | Irf1      | Btg1     |
| 35   | Lig1    | Adh5       | Ptprcap  | Cd53      | Sdc4     |
| 36   | Snrpd1  | Imp3       | Glul     | Ifitm1    | Ifih1    |
| 37   | Dnmt1   | Rps26      | Ogt      | Shisa5    | Ncf1     |
| 38   | Itga2b  | Fkbp1a     | Zfp608   | Oasl2     | Herpud1  |
| 39   | Rrm1    | Gmfg       | Akap13   | Tnfsf10   | Milr1    |
| 40   | Mcm3    | Ctsd       | Tbxas1   | Pnp       | Lsp1     |
| 41   | Tyms    | Ccdc107    | Nceh1    | Junb      | Ptms     |
| 42   | Pclaf   | Dtd1       | Ptpre    | Trim30a   | Clic4    |
| 43   | Atad2   | Scp2       | Mecom    | Apobec3   | Lcn2     |
| 44   | Slc25a5 | Rpl32      | Sptssa   | Ifitm3    | Parp14   |
| 45   | Hdgf    | Naca       | Ldhd     | Epsti1    | Slfn2    |
| 46   | Dtymk   | Mrpl52     | Sptbn1   | Selp      | Hspa8    |
| 47   | Nasp    | Tmem205    | Tsc22d3  | Socs3     | Eif1     |
| 48   | Dek     | Matk       | Klhl24   | Ppa1      | Ebi3     |
| 49   | Gmn     | Il1ra1     | Alox5ap  | Irgm1     | Rasip1   |
| 50   | Hmgb3   | Abhd14a    | Atp2b4   | Ly6e      | Serp1    |

**Appendix Table S1.** List of Top50 genes differentially expressed in the 5 distinct sub-clusters.

## Appendix Table S2

| <b>Myeloid</b> | <b>Lymphoid</b> |
|----------------|-----------------|
| Hdc            | Flt3            |
| Csf3r          | Tcf3            |
| Irf8           | Notch1          |
| Nr4a1          | Zbtb1           |
| Ccl5           | Satb1           |
| Cebpb          | Ikzf1           |
| Cebpd          | Egr1            |

**Appendix Table S2.** List of genes used to define the myeloid-biased or lymphoid-biased HSCs in Figure 1g.
